# Supplementary material for: Rapid isotopic analysis of uranium particles by laser ablation MC-ICP-MS
Source: Royal Society of Chemistry journal article supplement (doi:10.1039/d2ja00403h), 2023-01-01
Supplement: d2ja00403h1.pdf [file d2ja00403h1.pdf]

## **Rapid Isotopic Analysis of Uranium Particles by Laser Ablation MC-ICP-MS**

### **Supplementary Materials**

#### **Supplement 1 – Text**

**Supplementary text S1** – Calculation of Mass Bias Correction Factor

**Supplementary text S2** – Calculation of Ion Counter Gain Correction Factor

#### **Supplement 2 – Tables**

**Table S1** - Isotopic compositions of the 6 reference glasses analyzed in this study

**Table S2** - Isotopic composition of 5 reference glasses measured in situ by NanoSIMS and SIM-SSAMS.

**Table S3** - U isotope ratios in the U200 reference standard previously characterized by solution MC-ICP-MS and SIMS

**Table S4** - Uranium isotopic composition of reference glasses measured by laser ablation MC-ICP-MS

**Table S5** - Uranium isotopic composition of CRM U200 particles measured by laser ablation MC-ICP-MS

**Table S6** - Uranium isotopic composition of SRNL-DU particles measured by laser ablation MC-ICP-MS

#### **Supplement 3 – Figures**

**Fig. S1** - Detector array on the Neptune-Plus MC-ICP-MS

**Fig. S2** - Laser ablation trace from rastering over a sample of U200 particles

**Fig. S3** - Uranium isotope systematics in NIST 610 and CAS-94-500

**Fig. S4** - Uranium isotope systematics in CAS-53-50 and CAS-53-500

**Fig. S5** - U isotope systematics in samples of CAS-94-500 measured by solution and LA-MC-ICP-MS

## Supplement 1 – Text

### Supplementary text S1. Calculation of Mass Bias Correction Factor

Mass bias and ion counter gain corrections are made by replicate analyses of the CAS-53-500 reference glass prior to, during, and after sample analyzes. The clear advantage of using the CAS-53-500 glass for correcting mass bias is that it contains subequal amounts of  $^{235}\text{U}$  and  $^{238}\text{U}$ , which means both isotopes can be measured using Faraday detectors, which lowers associated uncertainties compared to natural U in which the  $^{235}\text{U}$  content is relatively low (~0.0072). The mass bias factor (MBF) is calculated assuming fractionation follows the exponential law, using Equation 1:

$$MBF = \frac{\ln\left[\frac{(^{235}\text{U}/^{238}\text{U})_{STD\_true}}{(^{235}\text{U}/^{238}\text{U})_{STD\_measured}}\right]}{\ln\left[M^{235}\text{U}/M^{238}\text{U}\right]} \quad \text{Equation 1}$$

Where the measured and true isotope ratios are those of a reference standard and M is the mass of the isotope. The MBF can then be used to correct the isotopic composition of an unknown using Equation 2:

$$\frac{^{235}\text{U}}{^{238}\text{U}}_{SMP\_unknown} = \frac{^{235}\text{U}}{^{238}\text{U}}_{SMP\_measured} \times \left(M^{235}\text{U}/M^{238}\text{U}\right)^{MBF} \quad \text{Equation 2}$$

The MBF is not a constant value and can vary both between and within analytical sessions. Thus, an added benefit of using a glass standard to calculate the MBF is that it can be analyzed multiple times during each session to characterize temporal changes in the MBF and apply an interpolated correction to the unknowns. A linear correction factor is applied between mass bias standards with a conservative expansion of uncertainty to account for potential non-linear drift. All relevant sources of measurement and instrument calibration uncertainty were propagated into final U isotope ratios via the Monte Carlo method.

### Supplementary text S2. Calculation of Ion Counter Gain Correction Factor

The ion counter gain factor ensures equivalency between signals generated by Faraday detectors and signals generated on individual ion counters. Because the response of ion counters degrade over time and each

individual ion counter performs differently, individual gain factors are required for each detector. The CAS-53-500 reference standard has well characterized  $^{234}\text{U}/^{238}\text{U}$  and  $^{236}\text{U}/^{238}\text{U}$  ratios, providing robust correction factors for IC3 ( $^{234}\text{U}$ ) and IC1B ( $^{236}\text{U}$ ). Once the MBF has been calculated (Equation 2), it is used to calculate the corrected  $^{234}\text{U}/^{238}\text{U}$  and  $^{236}\text{U}/^{238}\text{U}$  ratios, as shown below in Equation 3:

$$\frac{^{23x}\text{U}}{^{238}\text{U}}_{SMP\_unknown} = \frac{^{23x}\text{U}}{^{238}\text{U}}_{SMP\_measured} \times \left( M^{23x}\text{U} / M^{238}\text{U} \right)^{MBF} \quad \text{Equation 3}$$

Where  $^{23x}\text{U}$  refers to the minor isotope measured by ion counter. Once the mass bias corrected  $^{23x}\text{U}/^{238}\text{U}$  ratio has been calculated for CAS-53-500 the corrected ratio is compared to the known ratio and the proportional difference is the ion counter gain, as shown below for IC3 ( $^{234}\text{U}$ ):

$$IC3 \text{ gain factor} = \left( \frac{^{234}\text{U}}{^{238}\text{U}}_{STD\_corrected} / \frac{^{234}\text{U}}{^{238}\text{U}}_{STD\_true} \right) \quad \text{Equation 4}$$

Shifts in the ion counter gain factors occur between and within analytical sessions. For this reason, the ion counter gain corrections are also interpolated for each unknown.

Online ion counter gain corrections cannot be performed for IC2 ( $^{235}\text{U}$ ) because of the relatively high abundance of  $^{235}\text{U}$  in CAS-53-500, meaning it has to be measured by Faraday detector. Instead, the IC2 gain factor was estimated by analyzing a low-level U solution (NBS 960) by MC-ICP-MS with  $^{235}\text{U}$  on IC2. The average IC2 gain factor over several analytical sessions was used as a constant during the laser ablation analyses. Although this produced acceptable results, we recognize that this is not an ideal solution as the gain factor may shift significantly in between analytical sessions, particularly if these sessions take place weeks or months apart. To address this in future studies we propose that an alternative reference material with a depleted  $^{235}\text{U}$  content is used as a secondary standard purely to calculate the IC2 gain.

## Supplement 2 – Tables

**Table S1** – Isotopic compositions of the 6 reference glasses analyzed in this study. Isotopic compositions taken from measured by solution MC-ICP-MS at LLNL<sup>1,2</sup>, unless otherwise stated. Uncertainties are external precisions associated with replicate analyses at the 2 $\sigma$  level.

|                        | $^{234}\text{U}/^{238}\text{U}$ | 2 $\sigma$ | $^{235}\text{U}/^{238}\text{U}$ | 2 $\sigma$ | $^{236}\text{U}/^{238}\text{U}$ | 2 $\sigma$ |
|------------------------|---------------------------------|------------|---------------------------------|------------|---------------------------------|------------|
| CAS3-53-500            | 0.007995                        | 0.000035   | 1.1240                          | 0.0029     | 0.005639                        | 0.000024   |
| CAS3-94-500            | 0.1682                          | 0.0018     | 15.91                           | 0.16       | 0.05031                         | 0.00054    |
| SAC-53-50              | 0.007806                        | 0.000020   | 1.0985                          | 0.0022     | 0.005498                        | 0.000013   |
| SAC-53-500             | 0.008017                        | 0.000013   | 1.1283                          | 0.0013     | 0.0056467                       | 0.0000082  |
| NIST 610 <sup>25</sup> | 0.00000945                      | 0.00000005 | 0.00239555                      | 0.00000047 | 0.00004314                      | 0.00000004 |

**Table S2** – Isotopic composition of 5 reference glasses measured in situ by NanoSIMS and SIM-SSAMS. Uncertainties are external precision associated with replicate analyses at the 2 $\sigma$  level. Here, the RSDs are used as a first-order indicator of the isotopic heterogeneity within in each glass.

| Sample     | Technique | $^{234}\text{U}/^{238}\text{U}$ | 2 $\sigma$ | RSD   | $^{235}\text{U}/^{238}\text{U}$ | 2 $\sigma$ | RSD   | $^{236}\text{U}/^{238}\text{U}$ | 2 $\sigma$ | RSD   |
|------------|-----------|---------------------------------|------------|-------|---------------------------------|------------|-------|---------------------------------|------------|-------|
| CAS-94-500 | NanoSIMS  | 0.166603                        | 0.022711   | 13.6% | 16.19534                        | 1.676335   | 10.4% | 0.049957                        | 0.005356   | 10.7% |
|            | SIM-SSAMS | 0.1686                          | 0.006083   | 3.6%  | 16.06051                        | 0.268602   | 1.7%  | 0.050714                        | 0.002338   | 4.6%  |
| CAS-53-500 | NanoSIMS  | 0.008026                        | 0.000504   | 6.3%  | 1.139124                        | 0.025083   | 2.2%  | 0.005541                        | 0.000655   | 11.8% |
|            | SIM-SSAMS | 0.007974                        | 0.000123   | 1.5%  | 1.120241                        | 0.004958   | 0.4%  | 0.005677                        | 6.37E-05   | 1.1%  |
| SAC-53-50  | NanoSIMS  | 0.007734                        | 0.002855   | 36.9% | 1.078263                        | 0.076112   | 7.1%  | 0.005974                        | 0.002397   | 40.1% |
|            | SIM-SSAMS | 0.007894                        | 0.001556   | 19.7% | 1.089784                        | 0.03103    | 2.8%  | 0.005504                        | 0.000748   | 13.6% |
| SAC-53-500 | NanoSIMS  | not measured                    |            |       |                                 |            |       |                                 |            |       |
|            | SIM-SSAMS | 0.00792                         | 0.000257   | 3.2%  | 1.122397                        | 0.021632   | 1.9%  | 0.005616                        | 0.000419   | 7.5%  |

**Table S3** – U isotope ratios in the U200 reference standard previously characterized by solution MC-ICP-MS<sup>3</sup> and the DU sample from SRNL that was characterized using SIMS<sup>4</sup>. Uncertainties are external precisions associated with replicate analyses at the 2 $\sigma$  level.

| Standard ID | $^{234}\text{U}/^{238}\text{U}$ | 2 $\sigma$ | $^{235}\text{U}/^{238}\text{U}$ | 2 $\sigma$ | $^{236}\text{U}/^{238}\text{U}$ | 2 $\sigma$ |
|-------------|---------------------------------|------------|---------------------------------|------------|---------------------------------|------------|
| U200        | 0.0015661                       | 0.0000021  | 0.25119                         | 0.00025    | 0.0026549                       | 0.0000019  |
| SRNL-DU     | 0.0000068                       | 0.0000035  | 0.00173                         | 0.00010    | 0.0000807                       | 0.0000086  |

**Table S4** – Uranium isotopic composition of reference glasses measured by laser ablation MC-ICP-MS

| Sample Name | <sup>235</sup> U detector | <sup>234</sup> U/ <sup>238</sup> U | CSU (1σ) | <sup>235</sup> U/ <sup>238</sup> U | CSU (1σ) | <sup>236</sup> U/ <sup>238</sup> U | CSU (1σ) |
|-------------|---------------------------|------------------------------------|----------|------------------------------------|----------|------------------------------------|----------|
| CAS-94-500  | Faraday                   | 0.05109                            | 0.00015  | 16.0956                            | 0.0243   | 0.17011                            | 0.00049  |
| CAS-94-500  | Faraday                   | 0.05102                            | 0.00014  | 16.1096                            | 0.0251   | 0.17016                            | 0.00046  |
| CAS-94-500  | Faraday                   | 0.05091                            | 0.00017  | 16.0917                            | 0.0263   | 0.17012                            | 0.00048  |
| CAS-94-500  | Faraday                   | 0.05089                            | 0.00017  | 16.0908                            | 0.0260   | 0.16999                            | 0.00055  |
| CAS-94-500  | Faraday                   | 0.05115                            | 0.00017  | 16.1303                            | 0.0258   | 0.17073                            | 0.00052  |
| CAS-94-500  | Faraday                   | 0.05029                            | 0.00016  | 16.1011                            | 0.0241   | 0.16843                            | 0.00045  |
| CAS-94-500  | Faraday                   | 0.05105                            | 0.00013  | 16.1052                            | 0.0239   | 0.17054                            | 0.00041  |
| CAS-94-500  | Faraday                   | 0.05101                            | 0.00014  | 16.1101                            | 0.0242   | 0.17019                            | 0.00042  |
| CAS-94-500  | Faraday                   | 0.05103                            | 0.00014  | 16.1075                            | 0.0255   | 0.17025                            | 0.00042  |
| CAS-94-500  | Faraday                   | 0.05097                            | 0.00014  | 16.1149                            | 0.0263   | 0.17025                            | 0.00044  |
| CAS-94-500  | Faraday                   | 0.05080                            | 0.00016  | 16.0934                            | 0.0233   | 0.17036                            | 0.00051  |
| CAS-94-500  | Faraday                   | 0.05075                            | 0.00017  | 16.0990                            | 0.0230   | 0.16987                            | 0.00055  |
| CAS-94-500  | Faraday                   | 0.05085                            | 0.00016  | 16.0882                            | 0.0225   | 0.17009                            | 0.00054  |
| CAS-94-500  | Faraday                   | 0.05086                            | 0.00017  | 16.0985                            | 0.0235   | 0.16984                            | 0.00053  |
| CAS-94-500  | Faraday                   | 0.05078                            | 0.00016  | 16.0780                            | 0.0244   | 0.17010                            | 0.00054  |
| SAC-53-500  | Faraday                   | 0.005665                           | 0.000017 | 1.1259                             | 0.0015   | 0.008005                           | 0.000023 |
| SAC-53-500  | Faraday                   | 0.005655                           | 0.000015 | 1.1262                             | 0.0015   | 0.007999                           | 0.000022 |
| SAC-53-500  | Faraday                   | 0.005653                           | 0.000017 | 1.1262                             | 0.0015   | 0.008006                           | 0.000021 |
| SAC-53-500  | Faraday                   | 0.005658                           | 0.000018 | 1.1257                             | 0.0015   | 0.007991                           | 0.000024 |
| SAC-53-500  | Faraday                   | 0.005665                           | 0.000018 | 1.1262                             | 0.0015   | 0.008013                           | 0.000025 |
| SAC-53-500  | Faraday                   | 0.005600                           | 0.000017 | 1.1258                             | 0.0015   | 0.007930                           | 0.000022 |
| SAC-53-500  | Faraday                   | 0.005661                           | 0.000015 | 1.1261                             | 0.0015   | 0.008010                           | 0.000020 |
| SAC-53-500  | Faraday                   | 0.005658                           | 0.000014 | 1.1257                             | 0.0015   | 0.007992                           | 0.000019 |
| SAC-53-500  | Faraday                   | 0.005670                           | 0.000014 | 1.1259                             | 0.0015   | 0.007994                           | 0.000020 |
| SAC-53-500  | Faraday                   | 0.005655                           | 0.000015 | 1.1258                             | 0.0015   | 0.007997                           | 0.000020 |
| SAC-53-500  | Faraday                   | 0.005642                           | 0.000019 | 1.1260                             | 0.0015   | 0.008017                           | 0.000027 |
| SAC-53-500  | Faraday                   | 0.005637                           | 0.000021 | 1.1262                             | 0.0015   | 0.007981                           | 0.000029 |
| SAC-53-500  | Faraday                   | 0.005657                           | 0.000019 | 1.1263                             | 0.0015   | 0.008014                           | 0.000027 |
| SAC-53-500  | Faraday                   | 0.005640                           | 0.000019 | 1.1262                             | 0.0015   | 0.007982                           | 0.000027 |
| SAC-53-500  | Faraday                   | 0.005663                           | 0.000038 | 1.1260                             | 0.0015   | 0.008001                           | 0.000054 |
| SAC-53-50   | Faraday                   | 0.005529                           | 0.000023 | 1.1007                             | 0.0017   | 0.007832                           | 0.000029 |
| SAC-53-50   | Faraday                   | 0.005544                           | 0.000023 | 1.1008                             | 0.0017   | 0.007819                           | 0.000027 |
| SAC-53-50   | Faraday                   | 0.005502                           | 0.000025 | 1.1023                             | 0.0018   | 0.007825                           | 0.000030 |
| SAC-53-50   | Faraday                   | 0.005521                           | 0.000025 | 1.1003                             | 0.0018   | 0.007842                           | 0.000030 |
| SAC-53-50   | Faraday                   | 0.005545                           | 0.000025 | 1.1002                             | 0.0018   | 0.007849                           | 0.000031 |
| SAC-53-50   | Faraday                   | 0.005502                           | 0.000023 | 1.1003                             | 0.0017   | 0.007781                           | 0.000026 |
| SAC-53-50   | Faraday                   | 0.005500                           | 0.000023 | 1.0996                             | 0.0018   | 0.007829                           | 0.000027 |
| SAC-53-50   | Faraday                   | 0.005508                           | 0.000021 | 1.1002                             | 0.0019   | 0.007843                           | 0.000029 |

|           |         |            |            |           |           |            |            |
|-----------|---------|------------|------------|-----------|-----------|------------|------------|
| SAC-53-50 | Faraday | 0.005543   | 0.000023   | 1.0991    | 0.0017    | 0.007800   | 0.000025   |
| SAC-53-50 | Faraday | 0.005538   | 0.000022   | 1.1010    | 0.0018    | 0.007831   | 0.000027   |
| SAC-53-50 | Faraday | 0.005515   | 0.000022   | 1.1010    | 0.0017    | 0.007841   | 0.000031   |
| SAC-53-50 | Faraday | 0.005492   | 0.000025   | 1.1003    | 0.0017    | 0.007799   | 0.000033   |
| SAC-53-50 | Faraday | 0.005505   | 0.000023   | 1.1005    | 0.0016    | 0.007821   | 0.000031   |
| SAC-53-50 | Faraday | 0.005513   | 0.000024   | 1.0993    | 0.0016    | 0.007818   | 0.000033   |
| SAC-53-50 | Faraday | 0.005522   | 0.000024   | 1.1001    | 0.0017    | 0.007824   | 0.000032   |
|           |         |            |            |           |           |            |            |
| NIST610   | IC      | 0.00004456 | 0.00000034 | 0.0023541 | 0.0000058 | 0.00001068 | 0.00000012 |
| NIST610   | IC      | 0.00004405 | 0.00000034 | 0.0023548 | 0.0000056 | 0.00001046 | 0.00000014 |
| NIST610   | IC      | 0.00004443 | 0.00000035 | 0.0023561 | 0.0000056 | 0.00001051 | 0.00000015 |
| NIST610   | IC      | 0.00004474 | 0.00000033 | 0.0023527 | 0.0000059 | 0.00001043 | 0.00000014 |
| NIST610   | IC      | 0.00004448 | 0.00000038 | 0.0023532 | 0.0000062 | 0.00001063 | 0.00000016 |
| NIST610   | IC      | 0.00004489 | 0.00000031 | 0.0023557 | 0.0000057 | 0.00001104 | 0.00000013 |
| NIST610   | IC      | 0.00004478 | 0.00000032 | 0.0023549 | 0.0000055 | 0.00001084 | 0.00000013 |
| NIST610   | IC      | 0.00004504 | 0.00000030 | 0.0023537 | 0.0000058 | 0.00001096 | 0.00000012 |
| NIST610   | IC      | 0.00004419 | 0.00000034 | 0.0023537 | 0.0000054 | 0.00001079 | 0.00000012 |
| NIST610   | IC      | 0.00004465 | 0.00000034 | 0.0023562 | 0.0000055 | 0.00001083 | 0.00000014 |
| NIST610   | IC      | 0.00004446 | 0.00000029 | 0.0023522 | 0.0000066 | 0.00001091 | 0.00000012 |
| NIST610   | IC      | 0.00004452 | 0.00000031 | 0.0023566 | 0.0000075 | 0.00001060 | 0.00000012 |
| NIST610   | IC      | 0.00004426 | 0.00000028 | 0.0023550 | 0.0000068 | 0.00001089 | 0.00000013 |
| NIST610   | IC      | 0.00004442 | 0.00000029 | 0.0023513 | 0.0000077 | 0.00001061 | 0.00000012 |
| NIST610   | IC      | 0.00004474 | 0.00000031 | 0.0023560 | 0.0000083 | 0.00001063 | 0.00000013 |

Note - Uncertainties are total internal precision associated with each individual measurement and the combined standard uncertainty (CSU) is provided at the  $1\sigma$  level.

**Table S5** – Uranium isotopic composition of CRM U200 particles measured by laser ablation MC-ICP-MS

| Sample Name | <sup>235</sup> U detector | <sup>234</sup> U/ <sup>238</sup> U | CSU (1σ) | <sup>235</sup> U/ <sup>238</sup> U | CSU (1σ) | <sup>236</sup> U/ <sup>238</sup> U | CSU (1σ) |
|-------------|---------------------------|------------------------------------|----------|------------------------------------|----------|------------------------------------|----------|
| U200        | Faraday                   | 0.001555                           | 0.000013 | 0.2505                             | 0.0044   | 0.002559                           | 0.000021 |
| U200        | Faraday                   | 0.001569                           | 0.000015 | 0.2504                             | 0.0053   | 0.002546                           | 0.000028 |
| U200        | Faraday                   | 0.001545                           | 0.000012 | 0.2515                             | 0.0015   | 0.002486                           | 0.000031 |
| U200        | Faraday                   | 0.001581                           | 0.000019 | 0.2532                             | 0.0050   | 0.002515                           | 0.000033 |
| U200        | Faraday                   | 0.001443                           | 0.000010 | 0.2510                             | 0.0029   | 0.002325                           | 0.000020 |
| U200        | Faraday                   | 0.001558                           | 0.000030 | 0.2519                             | 0.0130   | 0.002572                           | 0.000058 |
| U200        | Faraday                   | 0.001574                           | 0.000013 | 0.2533                             | 0.0030   | 0.002535                           | 0.000019 |
| U200        | Faraday                   | 0.001095                           | 0.000009 | 0.2513                             | 0.0013   | 0.001675                           | 0.000011 |
| U200        | Faraday                   | 0.001527                           | 0.000016 | 0.2509                             | 0.0035   | 0.002517                           | 0.000024 |
| U200        | Faraday                   | 0.001530                           | 0.000010 | 0.2516                             | 0.0020   | 0.002501                           | 0.000015 |
| U200        | Faraday                   | 0.001568                           | 0.000025 | 0.2569                             | 0.0053   | 0.002673                           | 0.000038 |
| U200        | Faraday                   | 0.001516                           | 0.000011 | 0.2532                             | 0.0021   | 0.002497                           | 0.000016 |
| U200        | Faraday                   | 0.001547                           | 0.000008 | 0.2508                             | 0.0014   | 0.002530                           | 0.000012 |
| U200        | Faraday                   | 0.001544                           | 0.000011 | 0.2524                             | 0.0032   | 0.002552                           | 0.000017 |
| U200        | Faraday                   | 0.001453                           | 0.000010 | 0.2517                             | 0.0015   | 0.002343                           | 0.000014 |
| U200        | Faraday                   | 0.001604                           | 0.000057 | 0.2536                             | 0.0167   | 0.002396                           | 0.000079 |
| U200        | Faraday                   | 0.001560                           | 0.000009 | 0.2510                             | 0.0015   | 0.002481                           | 0.000012 |
| U200        | Faraday                   | 0.001570                           | 0.000011 | 0.2506                             | 0.0019   | 0.002540                           | 0.000015 |
| U200        | Faraday                   | 0.001579                           | 0.000022 | 0.2515                             | 0.0056   | 0.002469                           | 0.000079 |
| U200        | Faraday                   | 0.001596                           | 0.000013 | 0.2507                             | 0.0027   | 0.002531                           | 0.000019 |
| U200        | Faraday                   | 0.001465                           | 0.000039 | 0.2542                             | 0.0141   | 0.002579                           | 0.000148 |
| U200        | Faraday                   | 0.001553                           | 0.000011 | 0.2526                             | 0.0036   | 0.002544                           | 0.000018 |
| U200        | Faraday                   | 0.000403                           | 0.000004 | 0.2597                             | 0.0016   | 0.000669                           | 0.000006 |
| U200        | Faraday                   | 0.001508                           | 0.000032 | 0.2508                             | 0.0121   | 0.002536                           | 0.000058 |
| U200        | Faraday                   | 0.001583                           | 0.000010 | 0.2511                             | 0.0026   | 0.002594                           | 0.000015 |
| U200        | Faraday                   | 0.001577                           | 0.000022 | 0.2506                             | 0.0073   | 0.002530                           | 0.000037 |
| U200        | Faraday                   | 0.001473                           | 0.000048 | 0.2475                             | 0.0172   | 0.002507                           | 0.000091 |
| U200        | Faraday                   | 0.001536                           | 0.000009 | 0.2494                             | 0.0022   | 0.002602                           | 0.000014 |
| U200        | Faraday                   | 0.001553                           | 0.000016 | 0.2506                             | 0.0047   | 0.002597                           | 0.000029 |
| U200        | Faraday                   | 0.001525                           | 0.000017 | 0.2505                             | 0.0056   | 0.002558                           | 0.000036 |
| U200        | Faraday                   | 0.001553                           | 0.000029 | 0.2464                             | 0.0093   | 0.002558                           | 0.000052 |
| U200        | Faraday                   | 0.001415                           | 0.000011 | 0.2516                             | 0.0033   | 0.002275                           | 0.000018 |
| U200        | Faraday                   | 0.001324                           | 0.000022 | 0.2476                             | 0.0088   | 0.002093                           | 0.000036 |
| U200        | Faraday                   | 0.001522                           | 0.000006 | 0.2515                             | 0.0014   | 0.002541                           | 0.000009 |
| U200        | Faraday                   | 0.001562                           | 0.000011 | 0.2511                             | 0.0029   | 0.002627                           | 0.000020 |
| U200        | Faraday                   | 0.001587                           | 0.000027 | 0.2488                             | 0.0098   | 0.002600                           | 0.000044 |
| U200        | Faraday                   | 0.001307                           | 0.000011 | 0.2506                             | 0.0042   | 0.002141                           | 0.000018 |
| U200        | Faraday                   | 0.001563                           | 0.000005 | 0.2516                             | 0.0010   | 0.002610                           | 0.000009 |
| U200        | Faraday                   | 0.001584                           | 0.000017 | 0.2501                             | 0.0051   | 0.002614                           | 0.000028 |
| U200        | Faraday                   | 0.001554                           | 0.000009 | 0.2508                             | 0.0023   | 0.002615                           | 0.000013 |

|      |         |          |          |        |        |          |          |
|------|---------|----------|----------|--------|--------|----------|----------|
| U200 | Faraday | 0.001544 | 0.000009 | 0.2524 | 0.0021 | 0.002620 | 0.000014 |
| U200 | Faraday | 0.001549 | 0.000008 | 0.2509 | 0.0018 | 0.002563 | 0.000011 |
| U200 | Faraday | 0.001543 | 0.000012 | 0.2515 | 0.0054 | 0.002567 | 0.000020 |
| U200 | Faraday | 0.001571 | 0.000009 | 0.2509 | 0.0022 | 0.002580 | 0.000014 |
| U200 | Faraday | 0.001535 | 0.000007 | 0.2514 | 0.0012 | 0.002593 | 0.000010 |
| U200 | Faraday | 0.001563 | 0.000006 | 0.2510 | 0.0012 | 0.002562 | 0.000010 |
| U200 | Faraday | 0.001551 | 0.000004 | 0.2512 | 0.0007 | 0.002562 | 0.000007 |
| U200 | Faraday | 0.000314 | 0.000003 | 0.2675 | 0.0013 | 0.000504 | 0.000005 |
| U200 | Faraday | 0.001471 | 0.000006 | 0.2509 | 0.0015 | 0.002430 | 0.000009 |

Note - Uncertainties are total internal precision associated with each individual measurement and the combined standard uncertainty (CSU) is provided at the  $1\sigma$  level.



**Table S6** – Uranium isotopic composition of SRNL-DU particles measured by laser ablation MC-ICP-MS

| Sample Name | <sup>235</sup> U detector | <sup>234</sup> U/ <sup>238</sup> U | CSU (1σ)  | <sup>235</sup> U/ <sup>238</sup> U | CSU (1σ)  | <sup>236</sup> U/ <sup>238</sup> U | CSU (1σ)  |
|-------------|---------------------------|------------------------------------|-----------|------------------------------------|-----------|------------------------------------|-----------|
| SRNL DU     | Faraday                   | 0.0000073                          | 0.0000006 | 0.0013329                          | 0.0013809 | 0.0000806                          | 0.0000015 |
| SRNL DU     | Faraday                   | 0.0000060                          | 0.0000005 | 0.0016321                          | 0.0007527 | 0.0000819                          | 0.0000014 |
| SRNL DU     | Faraday                   | 0.0000075                          | 0.0000004 | 0.0018222                          | 0.0009097 | 0.0000803                          | 0.0000014 |
| SRNL DU     | Faraday                   | 0.0015190                          | 0.0004098 | 0.1632718                          | 0.2032309 | 0.0007227                          | 0.0002846 |
| SRNL DU     | Faraday                   | 0.0000074                          | 0.0000005 | 0.0016282                          | 0.0013420 | 0.0000764                          | 0.0000015 |
| SRNL DU     | Faraday                   | 0.0000077                          | 0.0000005 | 0.0015331                          | 0.0014296 | 0.0000781                          | 0.0000016 |
| SRNL DU     | Faraday                   | 0.0000055                          | 0.0000006 | 0.0009771                          | 0.0023713 | 0.0000794                          | 0.0000022 |
| SRNL DU     | Faraday                   | 0.0000078                          | 0.0000015 | NaN                                | NA        | 0.0000720                          | 0.0000034 |
| SRNL DU     | Faraday                   | 0.0000090                          | 0.0000009 | 0.0014834                          | 0.0017926 | 0.0000780                          | 0.0000021 |
| SRNL DU     | Faraday                   | 0.0000078                          | 0.0000008 | 0.0016158                          | 0.0024580 | 0.0000789                          | 0.0000022 |
| SRNL DU     | Faraday                   | 0.0000052                          | 0.0000008 | 0.0007199                          | 0.0033940 | 0.0000778                          | 0.0000029 |
| SRNL DU     | Faraday                   | 0.0000082                          | 0.0000009 | 0.0017834                          | 0.0026513 | 0.0000870                          | 0.0000022 |
| SRNL DU     | Faraday                   | 0.0000071                          | 0.0000004 | 0.0017326                          | 0.0010512 | 0.0000780                          | 0.0000012 |
| SRNL DU     | Faraday                   | 0.0000073                          | 0.0000004 | 0.0016480                          | 0.0010985 | 0.0000777                          | 0.0000013 |
| SRNL DU     | Faraday                   | 0.0000068                          | 0.0000006 | 0.0017019                          | 0.0011998 | 0.0000798                          | 0.0000013 |
| SRNL DU     | Faraday                   | 0.0000083                          | 0.0000005 | 0.0015850                          | 0.0014420 | 0.0000760                          | 0.0000013 |
| SRNL DU     | Faraday                   | 0.0000066                          | 0.0000006 | 0.0008201                          | 0.0017361 | 0.0000765                          | 0.0000016 |
| SRNL DU     | Faraday                   | 0.0000074                          | 0.0000007 | 0.0017034                          | 0.0014423 | 0.0000763                          | 0.0000019 |
| SRNL DU     | Faraday                   | 0.0000084                          | 0.0000013 | 0.0016070                          | 0.0160734 | 0.0000603                          | 0.0000065 |
| SRNL DU     | Faraday                   | 0.0000088                          | 0.0000008 | 0.0005452                          | 0.0041005 | 0.0000855                          | 0.0000033 |
| SRNL DU     | Faraday                   | 0.0000058                          | 0.0000010 | 0.0011288                          | 0.0055902 | 0.0000705                          | 0.0000034 |
| SRNL DU     | Faraday                   | 0.0000091                          | 0.0000009 | 0.0039931                          | 0.0038061 | 0.0000710                          | 0.0000029 |
| SRNL DU     | Faraday                   | 0.0000080                          | 0.0000008 | 0.0010844                          | 0.0041777 | 0.0000747                          | 0.0000029 |
| SRNL DU     | Faraday                   | 0.0000057                          | 0.0000008 | 0.0005095                          | 0.0042208 | 0.0000687                          | 0.0000027 |
| SRNL DU     | Faraday                   | 0.0000039                          | 0.0000006 | 0.0002991                          | 0.0044708 | 0.0000709                          | 0.0000025 |
| SRNL DU     | Faraday                   | 0.0000057                          | 0.0000007 | 0.0018574                          | 0.0040478 | 0.0000720                          | 0.0000028 |
| SRNL DU     | Faraday                   | 0.0000083                          | 0.0000011 | 0.0036308                          | 0.0069716 | 0.0000809                          | 0.0000042 |
| SRNL DU     | Faraday                   | 0.0000069                          | 0.0000009 | 0.0015891                          | 0.0041319 | 0.0000638                          | 0.0000026 |
| SRNL DU     | Faraday                   | 0.0000076                          | 0.0000007 | 0.0005070                          | 0.0041158 | 0.0000898                          | 0.0000030 |
| SRNL DU     | Faraday                   | 0.0000062                          | 0.0000004 | 0.0013965                          | 0.0009426 | 0.0000684                          | 0.0000015 |
| SRNL DU     | Faraday                   | 0.0000050                          | 0.0000013 | NaN                                | NA        | 0.0000905                          | 0.0000050 |
| SRNL DU     | Faraday                   | 0.0000075                          | 0.0000008 | 0.0022959                          | 0.0038077 | 0.0000773                          | 0.0000028 |
| SRNL DU     | Faraday                   | 0.0000075                          | 0.0000007 | 0.0008754                          | 0.0040699 | 0.0000875                          | 0.0000030 |
| SRNL DU     | Faraday                   | 0.0000076                          | 0.0000016 | 0.0008941                          | 0.0074027 | 0.0000723                          | 0.0000039 |
| SRNL DU     | Faraday                   | 0.0000038                          | 0.0000009 | 0.0018312                          | 0.0065452 | 0.0000896                          | 0.0000035 |
| SRNL DU     | Faraday                   | 0.0000069                          | 0.0000005 | 0.0017689                          | 0.0020076 | 0.0000751                          | 0.0000017 |
| SRNL DU     | Faraday                   | 0.0000065                          | 0.0000008 | 0.0018296                          | 0.0043395 | 0.0000771                          | 0.0000031 |
| SRNL DU     | Faraday                   | 0.0000102                          | 0.0000011 | 0.0026755                          | 0.0049377 | 0.0000654                          | 0.0000034 |
| SRNL DU     | Faraday                   | 0.0000074                          | 0.0000005 | 0.0015519                          | 0.0012775 | 0.0000682                          | 0.0000016 |
| SRNL DU     | Faraday                   | 0.0000076                          | 0.0000008 | 0.0020864                          | 0.0063121 | 0.0000696                          | 0.0000037 |

|         |         |           |           |           |           |           |           |
|---------|---------|-----------|-----------|-----------|-----------|-----------|-----------|
| SRNL DU | Faraday | 0.0000084 | 0.0000014 | 0.0010274 | 0.0106334 | 0.0000743 | 0.0000039 |
| SRNL DU | Faraday | 0.0000058 | 0.0000005 | 0.0015301 | 0.0029002 | 0.0000817 | 0.0000021 |
| SRNL DU | Faraday | 0.0000070 | 0.0000002 | 0.0016049 | 0.0006379 | 0.0000787 | 0.0000009 |
| SRNL DU | Faraday | 0.0000068 | 0.0000004 | 0.0021469 | 0.0016867 | 0.0000811 | 0.0000017 |
| SRNL DU | Faraday | 0.0000068 | 0.0000004 | 0.0013130 | 0.0019647 | 0.0000733 | 0.0000017 |
| SRNL DU | Faraday | 0.0000066 | 0.0000004 | 0.0020031 | 0.0018684 | 0.0000810 | 0.0000017 |
| SRNL DU | Faraday | 0.0000088 | 0.0000006 | 0.0018375 | 0.0020997 | 0.0000834 | 0.0000022 |
| SRNL DU | Faraday | 0.0000070 | 0.0000005 | 0.0014349 | 0.0015817 | 0.0000806 | 0.0000017 |
| SRNL DU | Faraday | 0.0000091 | 0.0000005 | 0.0014335 | 0.0018715 | 0.0000805 | 0.0000018 |
| SRNL DU | Faraday | 0.0000080 | 0.0000006 | 0.0019243 | 0.0036440 | 0.0000907 | 0.0000027 |
| SRNL DU | Faraday | 0.0000059 | 0.0000004 | 0.0018042 | 0.0014279 | 0.0000821 | 0.0000015 |
| SRNL DU | Faraday | 0.0000074 | 0.0000005 | 0.0017950 | 0.0015658 | 0.0000779 | 0.0000016 |
| SRNL DU | Faraday | 0.0000078 | 0.0000005 | 0.0016157 | 0.0014485 | 0.0000829 | 0.0000017 |
| SRNL DU | Faraday | 0.0000043 | 0.0000005 | 0.0013723 | 0.0022444 | 0.0000523 | 0.0000019 |
| SRNL DU | Faraday | 0.0000098 | 0.0000003 | 0.0028200 | 0.0009598 | 0.0000971 | 0.0000012 |
| SRNL DU | Faraday | 0.0000062 | 0.0000004 | 0.0006696 | 0.0014315 | 0.0000797 | 0.0000017 |
| SRNL DU | Faraday | 0.0000055 | 0.0000004 | 0.0010311 | 0.0017589 | 0.0000747 | 0.0000016 |
| SRNL DU | Faraday | 0.0000087 | 0.0000003 | 0.0020557 | 0.0005410 | 0.0000789 | 0.0000010 |
| SRNL DU | Faraday | 0.0000075 | 0.0000005 | 0.0013112 | 0.0021730 | 0.0000800 | 0.0000020 |
| SRNL DU | Faraday | 0.0000065 | 0.0000004 | 0.0017187 | 0.0015532 | 0.0000822 | 0.0000017 |
| SRNL DU | Faraday | 0.0000070 | 0.0000004 | 0.0020293 | 0.0015304 | 0.0000771 | 0.0000014 |
| SRNL DU | Faraday | 0.0000055 | 0.0000005 | 0.0015862 | 0.0024357 | 0.0000773 | 0.0000023 |
| SRNL DU | Faraday | 0.0000064 | 0.0000004 | 0.0016364 | 0.0016502 | 0.0000769 | 0.0000016 |
| SRNL DU | Faraday | 0.0000068 | 0.0000005 | 0.0013516 | 0.0020959 | 0.0000776 | 0.0000018 |
| SRNL DU | Faraday | 0.0000071 | 0.0000005 | 0.0012404 | 0.0016551 | 0.0000773 | 0.0000019 |
| SRNL DU | IC      | 0.0000067 | 0.0000005 | 0.0016782 | 0.0000079 | 0.0000791 | 0.0000014 |
| SRNL DU | IC      | 0.0000076 | 0.0000005 | 0.0016813 | 0.0000089 | 0.0000780 | 0.0000016 |
| SRNL DU | IC      | 0.0000071 | 0.0000006 | 0.0016550 | 0.0000062 | 0.0000790 | 0.0000014 |
| SRNL DU | IC      | 0.0000063 | 0.0000005 | 0.0016861 | 0.0000068 | 0.0000845 | 0.0000015 |
| SRNL DU | IC      | 0.0000075 | 0.0000005 | 0.0016989 | 0.0000068 | 0.0000779 | 0.0000014 |
| SRNL DU | IC      | 0.0000082 | 0.0000007 | 0.0016843 | 0.0000087 | 0.0000780 | 0.0000020 |
| SRNL DU | IC      | 0.0000070 | 0.0000003 | 0.0016754 | 0.0000060 | 0.0000765 | 0.0000011 |
| SRNL DU | IC      | 0.0000071 | 0.0000005 | 0.0016441 | 0.0000074 | 0.0000761 | 0.0000016 |
| SRNL DU | IC      | 0.0000065 | 0.0000003 | 0.0016806 | 0.0000068 | 0.0000796 | 0.0000010 |
| SRNL DU | IC      | 0.0000077 | 0.0000003 | 0.0016520 | 0.0000069 | 0.0000790 | 0.0000012 |
| SRNL DU | IC      | 0.0000074 | 0.0000004 | 0.0016769 | 0.0000061 | 0.0000807 | 0.0000013 |
| SRNL DU | IC      | 0.0000072 | 0.0000003 | 0.0016917 | 0.0000060 | 0.0000822 | 0.0000012 |
| SRNL DU | IC      | 0.0000101 | 0.0000007 | 0.0009319 | 0.0000050 | 0.0000922 | 0.0000015 |
| SRNL DU | IC      | 0.0000080 | 0.0000007 | 0.0016605 | 0.0000102 | 0.0000849 | 0.0000019 |
| SRNL DU | IC      | 0.0000096 | 0.0000005 | 0.0016815 | 0.0000099 | 0.0000801 | 0.0000019 |
| SRNL DU | IC      | 0.0000078 | 0.0000005 | 0.0016809 | 0.0000093 | 0.0000835 | 0.0000014 |
| SRNL DU | IC      | 0.0000080 | 0.0000005 | 0.0016846 | 0.0000096 | 0.0000821 | 0.0000019 |

|         |    |          |          |           |           |           |          |
|---------|----|----------|----------|-----------|-----------|-----------|----------|
| SRNL DU | IC | 0.000088 | 0.000005 | 0.0016611 | 0.000068  | 0.0000763 | 0.000014 |
| SRNL DU | IC | 0.000032 | 0.000007 | 0.0016833 | 0.0000240 | 0.0000914 | 0.000043 |
| SRNL DU | IC | 0.000072 | 0.000006 | 0.0016855 | 0.0000099 | 0.0000817 | 0.000021 |
| SRNL DU | IC | 0.000085 | 0.000006 | 0.0017044 | 0.0000101 | 0.0000863 | 0.000026 |
| SRNL DU | IC | 0.000069 | 0.000007 | 0.0017007 | 0.0000118 | 0.0000786 | 0.000031 |
| SRNL DU | IC | 0.000072 | 0.000006 | 0.0016894 | 0.0000163 | 0.0000736 | 0.000023 |
| SRNL DU | IC | 0.000077 | 0.000007 | 0.0016731 | 0.0000147 | 0.0000853 | 0.000021 |
| SRNL DU | IC | 0.000066 | 0.000004 | 0.0003513 | 0.0000033 | 0.0000628 | 0.000013 |
| SRNL DU | IC | 0.000069 | 0.000005 | 0.0016702 | 0.0000109 | 0.0000824 | 0.000021 |
| SRNL DU | IC | 0.000071 | 0.000006 | 0.0016637 | 0.0000093 | 0.0000782 | 0.000020 |
| SRNL DU | IC | 0.000070 | 0.000005 | 0.0016656 | 0.0000085 | 0.0000778 | 0.000019 |
| SRNL DU | IC | 0.000063 | 0.000003 | 0.0004256 | 0.0000046 | 0.0000641 | 0.000012 |
| SRNL DU | IC | 0.000078 | 0.000005 | 0.0016726 | 0.0000073 | 0.0000828 | 0.000016 |
| SRNL DU | IC | 0.000069 | 0.000004 | 0.0016496 | 0.0000079 | 0.0000840 | 0.000018 |
| SRNL DU | IC | 0.000065 | 0.000005 | 0.0016642 | 0.0000081 | 0.0000829 | 0.000018 |
| SRNL DU | IC | 0.000070 | 0.000006 | 0.0016616 | 0.0000087 | 0.0000818 | 0.000016 |
| SRNL DU | IC | 0.000075 | 0.000005 | 0.0016756 | 0.0000171 | 0.0000799 | 0.000024 |
| SRNL DU | IC | 0.000069 | 0.000005 | 0.0016914 | 0.0000124 | 0.0000847 | 0.000017 |
| SRNL DU | IC | 0.000065 | 0.000003 | 0.0004814 | 0.0000048 | 0.0000753 | 0.000012 |
| SRNL DU | IC | 0.000047 | 0.000005 | 0.0016941 | 0.0000117 | 0.0000827 | 0.000020 |
| SRNL DU | IC | 0.000061 | 0.000004 | 0.0016780 | 0.0000085 | 0.0000795 | 0.000014 |
| SRNL DU | IC | 0.000068 | 0.000005 | 0.0016981 | 0.0000072 | 0.0000865 | 0.000016 |
| SRNL DU | IC | 0.000073 | 0.000003 | 0.0005338 | 0.0000031 | 0.0000666 | 0.000011 |
| SRNL DU | IC | 0.000082 | 0.000005 | 0.0016732 | 0.0000086 | 0.0000852 | 0.000021 |

Note - Uncertainties are total internal precision associated with each individual measurement and the combined standard uncertainty (CSU) is provided at the  $1\sigma$  level.

### Supplement 3 - Figures

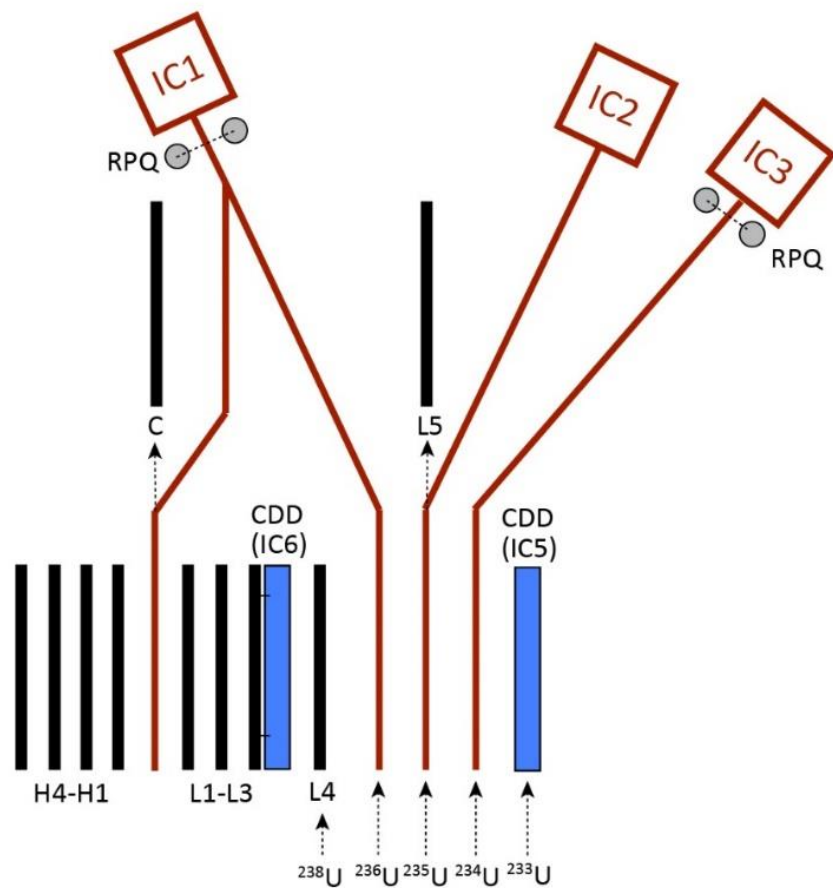

**Fig. S1** – Detector array on the Neptune-Plus MC-ICP-MS. Detectors: Faradays (black), SEMs (red), and CDDs (blue). The IC1 and IC3 SEMs are fitted with energy filters (RPQs). U isotopes and associated detectors used for analysis are labeled.

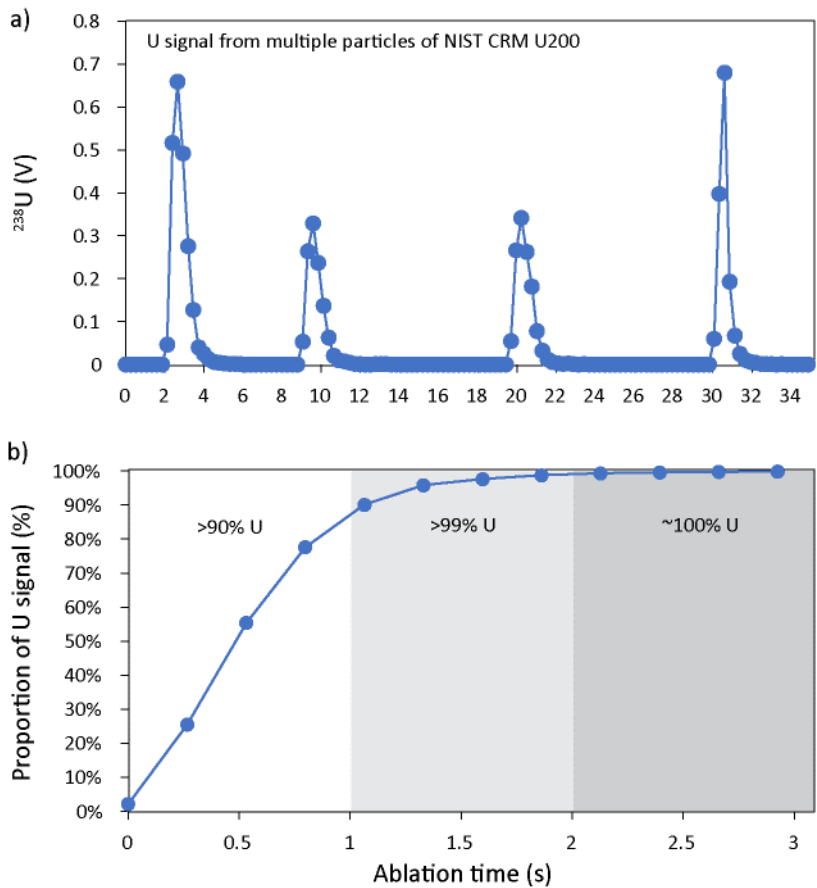

**Fig. S2** – Laser ablation trace from rastering over a sample of U200 particles. Typical  $^{238}\text{U}$  intensities generated from individual U200 particles are illustrated in a). The timeframe of U detection from a single particle is shown in horizontal axis of b). Note that the majority of U-signal is detected within 2 seconds of ablation initiation.

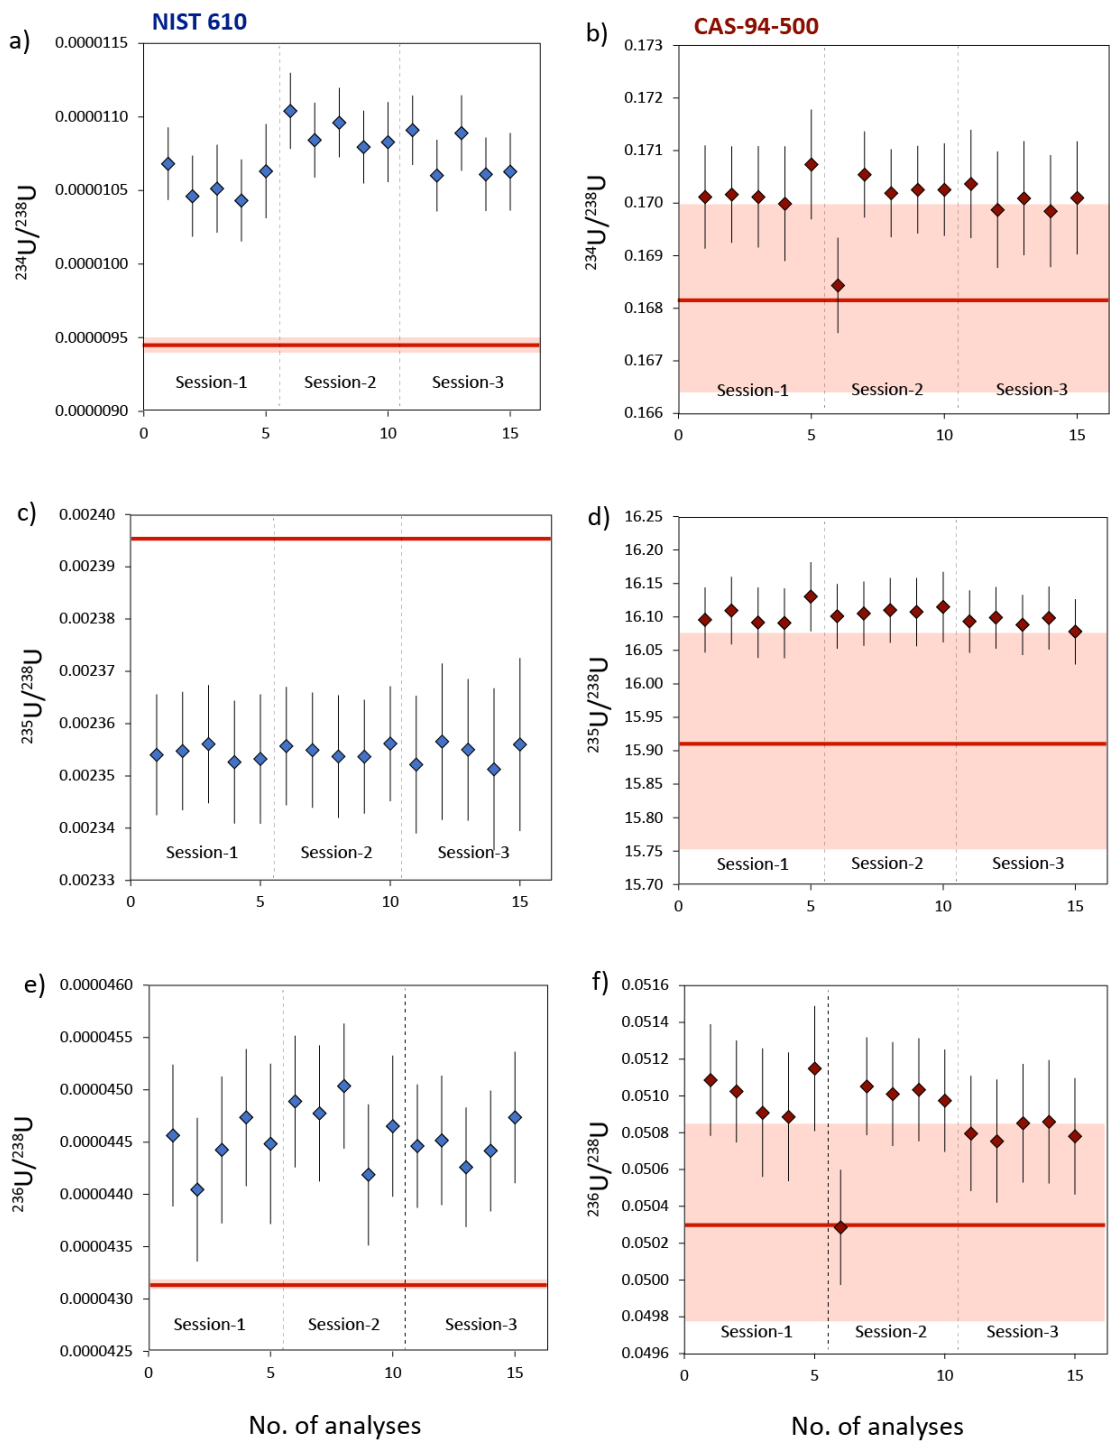

**Fig. S3.** Uranium isotope systematics in NIST 610 and CAS-94-500. Reference values and  $2\sigma$  uncertainties are shown in red<sup>1, 5</sup>. Error bars on individual data points are  $2\sigma$  and incorporate mass bias, ion counter gain and measurement uncertainties.

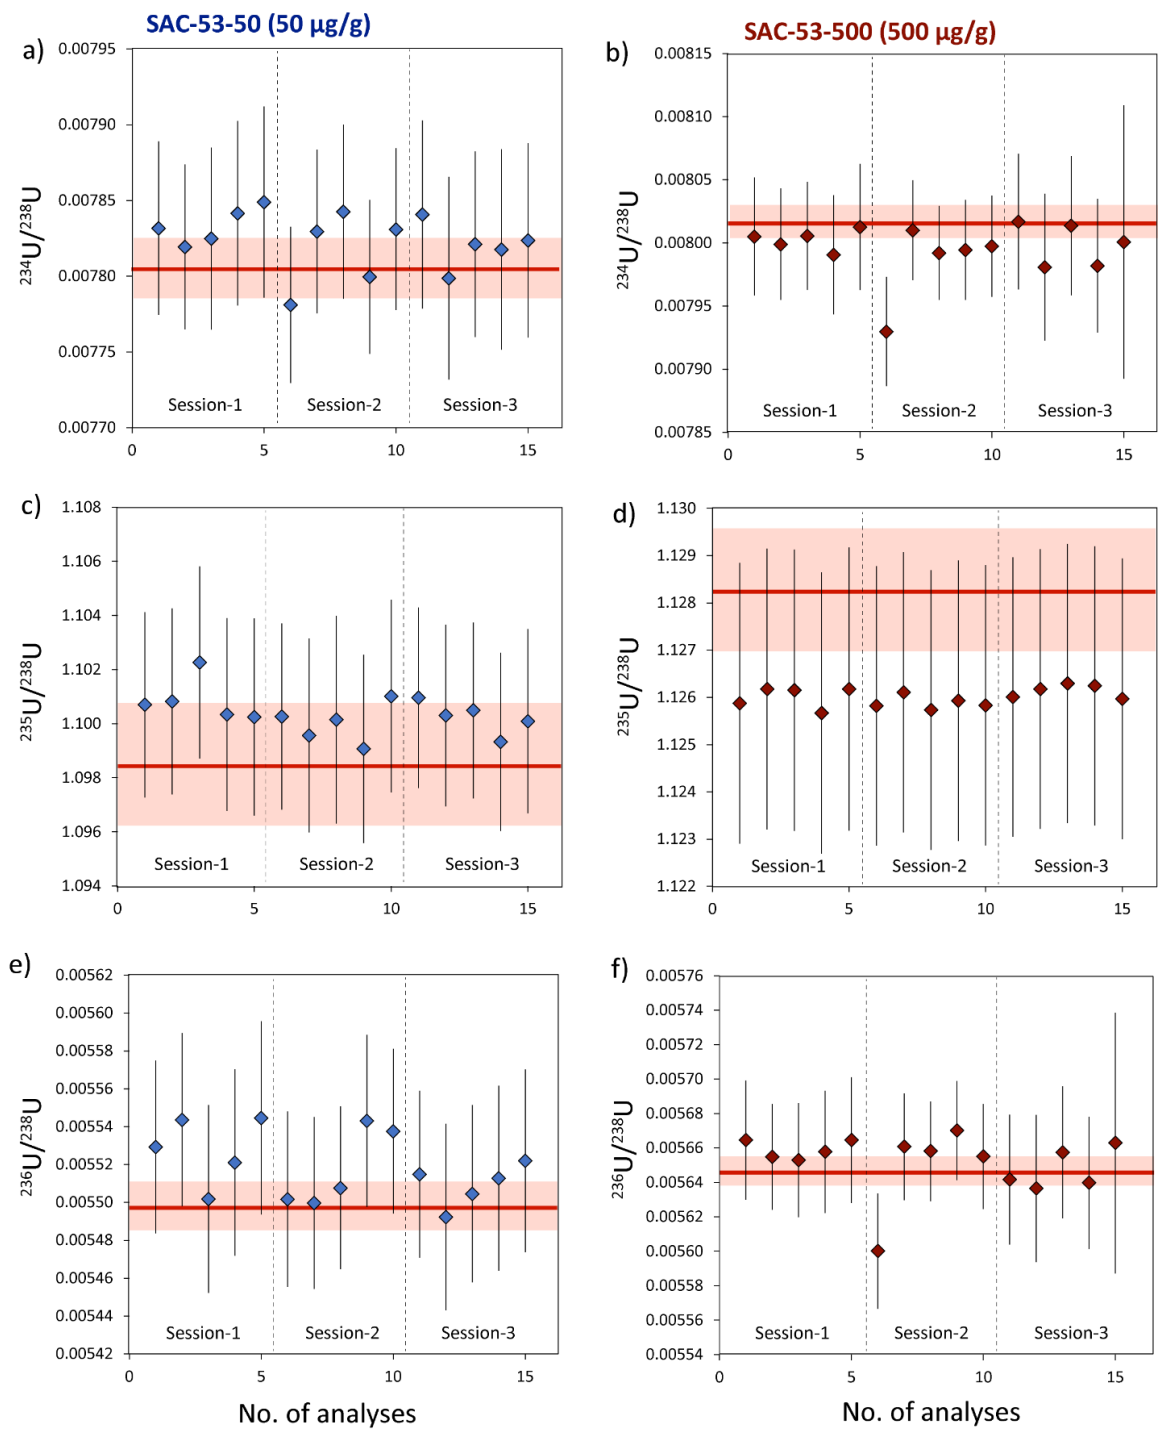

**Fig. S4.** Uranium isotope systematics in CAS-53-50 and CAS-53-500. Reference values and  $2\sigma$  uncertainties are shown in red<sup>1,5</sup>. Error bars on individual data points are  $2\sigma$  and incorporate mass bias, ion counter gain and measurement uncertainties.

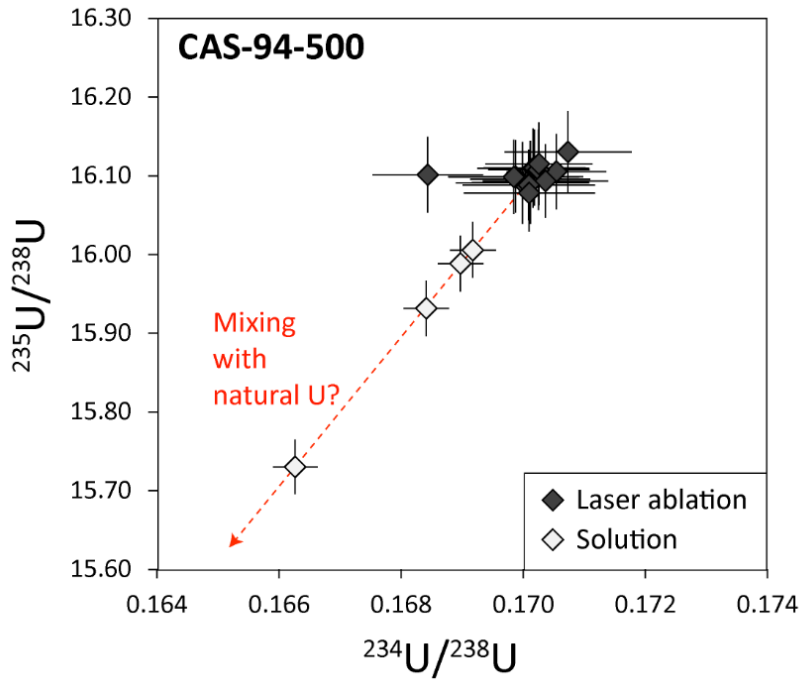

**Fig. S5** – U isotope systematics in samples of CAS-94-500 measured by solution and LA-MC-ICP-MS. A clear mixing line extends from the laser ablation measurements to the solution analyses, indicating mixing between HEU and less enriched (i.e. natural) contaminant. Uncertainties are  $2\sigma$ .



## References

- [1] Knight K, Wimpenny J, Weber P, Willingham D & Groopman E (2018) Goldschmidt Abstracts, 2018 1315.
- [2] Eppich, G. R., Wimpenny, J. B., Leever, M. E., Knight, K. B., Hutcheon, I. D., & Ryerson, F. J. (2016). Characterization of low concentration uranium glass working materials (No. LLNL-TR-645481). Lawrence Livermore National Lab.(LLNL), Livermore, CA (United States).
- [3] Richter, S., & Goldberg, S. A. (2003). Improved techniques for high accuracy isotope ratio measurements of nuclear materials using thermal ionization mass spectrometry. *International Journal of Mass Spectrometry*, 229(3), 181-197.
- [4] Scott, S. M., Baldwin, A. T., Bronikowski, M. G., II, M. A. D., Inabinet, L. A., Kuhne, W. W., ... & Wellons, M. S. (2021). Scale-up And Production Of Uranium-bearing QC Reference Particulates By An Aerosol Synthesis Method (No. SRNL-STI-2021-00350). Savannah River Site (SRS), Aiken, SC (United States). Savannah River National Lab.(SRNL).
- [5] Zimmer, M. M., Kinman, W. S., Kara, A. H., & Steiner, R. E. (2014). Evaluation of the homogeneity of the uranium isotope composition of NIST SRM 610/611 by MC-ICP-MS, MC-TIMS, and SIMS. *Minerals*, 4(2), 541-552.
